# Supplementary material for: Bilayered microelectrodes based on electrochemically deposited MnO2/polypyrrole towards fast charge transport kinetics for micro-supercapacitors
Source: PubMed Central journal article supplement — RSC Adv. 2020 May 13;10(31):18245–51. doi: 10.1039/d0ra01702g (PMC9053735; doi:10.1039/d0ra01702g), 2020-05-13
Supplement: RA-010-D0RA01702G-s001.pdf [file RA-010-D0RA01702G-s001.pdf]

## Electronic Supplementary Information

### Bilayered microelectrodes based on electrochemically deposited $\text{MnO}_2$ /polypyrrole towards fast charge transport kinetics for micro-supercapacitor

Waqas Ali Haider,<sup>a</sup> Liang He,<sup>\*a</sup> Hameed A. Mirza,<sup>b,c</sup> Muhammad Tahir,<sup>a</sup> Aamir Minhas Khan,<sup>d</sup> Kwadwo Asare Owusu,<sup>a</sup> Wei Yang,<sup>a</sup> Zhuqing Wang<sup>e</sup> and Liqiang Mai<sup>\*a</sup>

<sup>a</sup>State Key Laboratory of Advanced Technology for Materials Synthesis and Processing, Wuhan University of Technology, Wuhan 430070, Hubei, China.

\*E-mail: [hel@whut.edu.cn](mailto:hel@whut.edu.cn), [mlq518@whut.edu.cn](mailto:mlq518@whut.edu.cn)

<sup>b</sup>Department of Chemistry, York University, Toronto M3J 1P3, Ontario, Canada.

<sup>c</sup>A.S. Chemical Laboratories Inc., Concord L4K 4M4, Ontario, Canada.

<sup>d</sup>Department of Electrical Engineering and Computer Science, York University, Toronto, M3J 1P3 Canada.

<sup>e</sup>Graduate School of Engineering, Tohoku University, Sendai 980-8579, Japan.

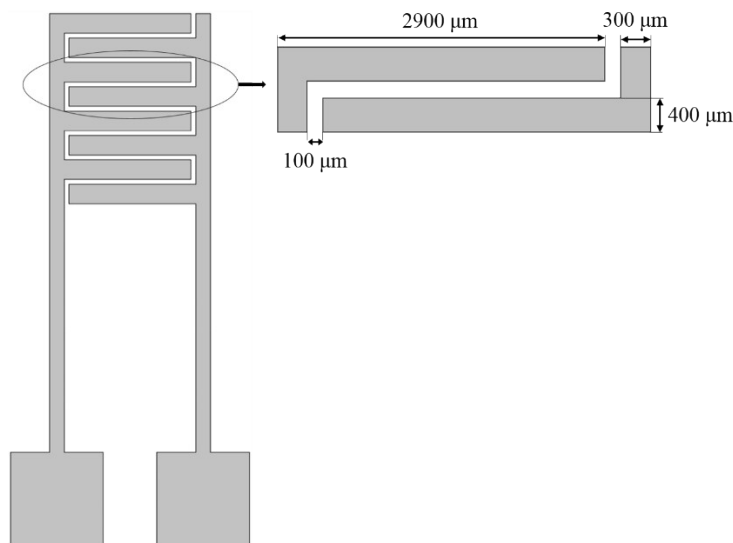

**Fig. S1.** Configuration and dimension of the microelectrodes.

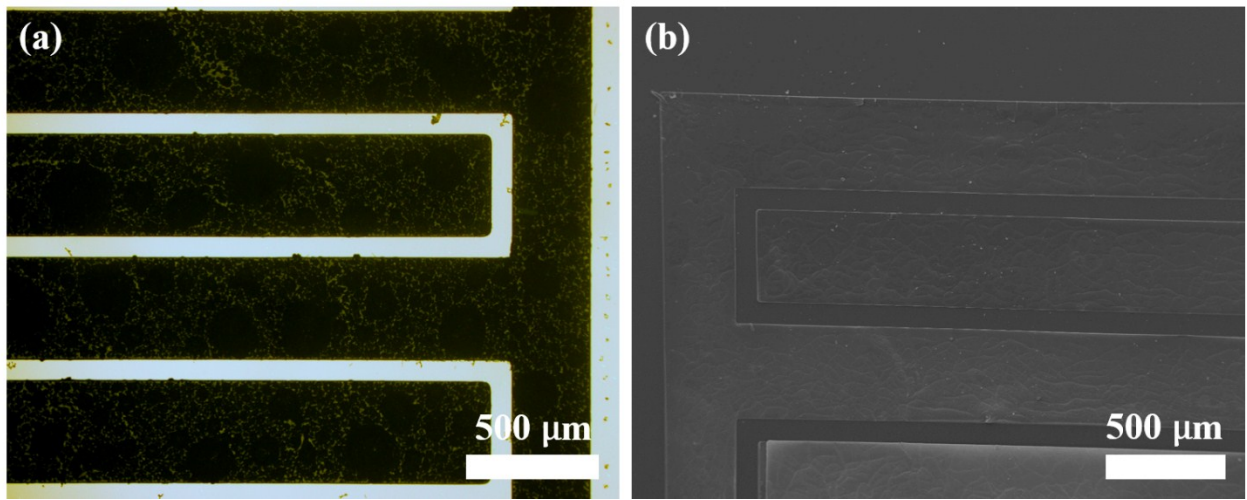

**Fig. S2.** (a) Optical microscope image and (b) SEM image of MnO<sub>2</sub>/PPy microelectrodes.

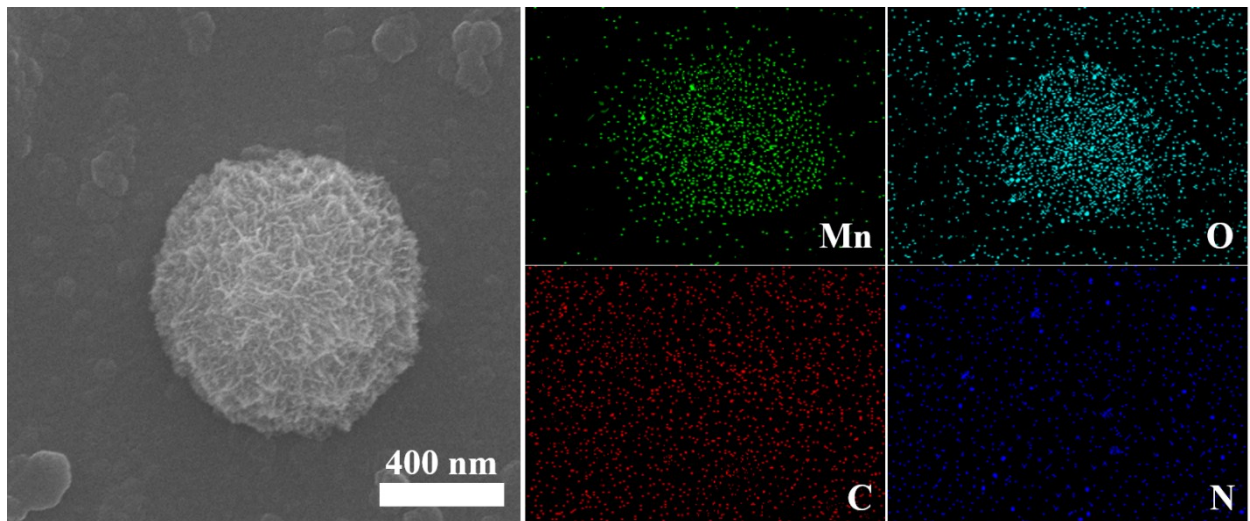

**Fig. S3.** EDS characterization results of MnO<sub>2</sub>/PPy.

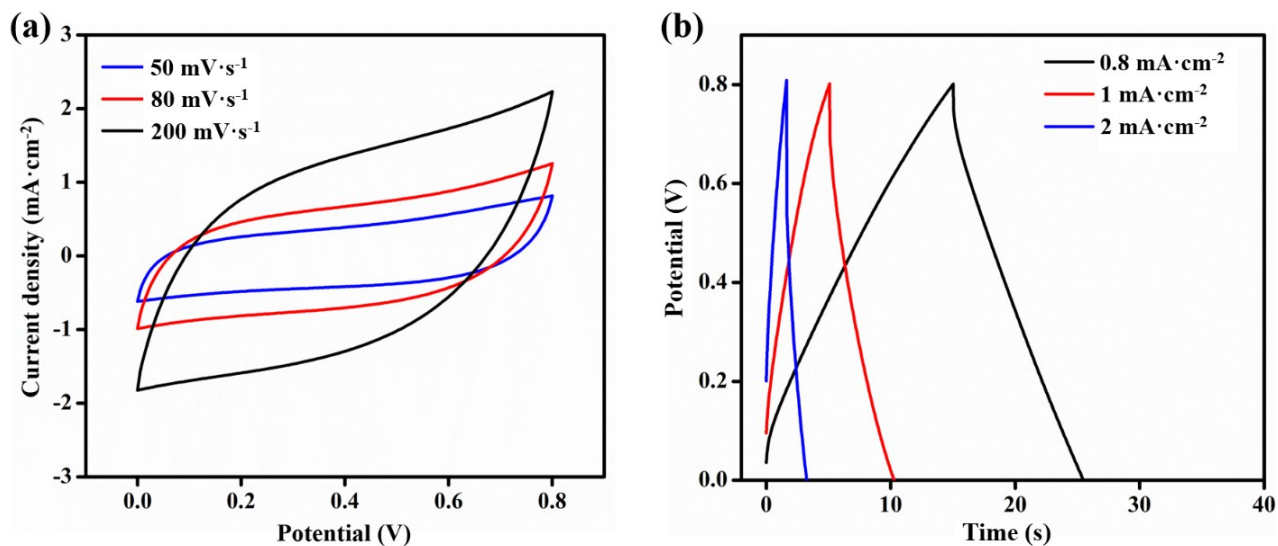

**Fig. S4.** Electrochemical performance of  $\text{MnO}_2/\text{PPy}\text{-MSC}$ . (a) Cyclic voltammetry curves at different scan rates and (b) charge-discharge curves at different current densities.

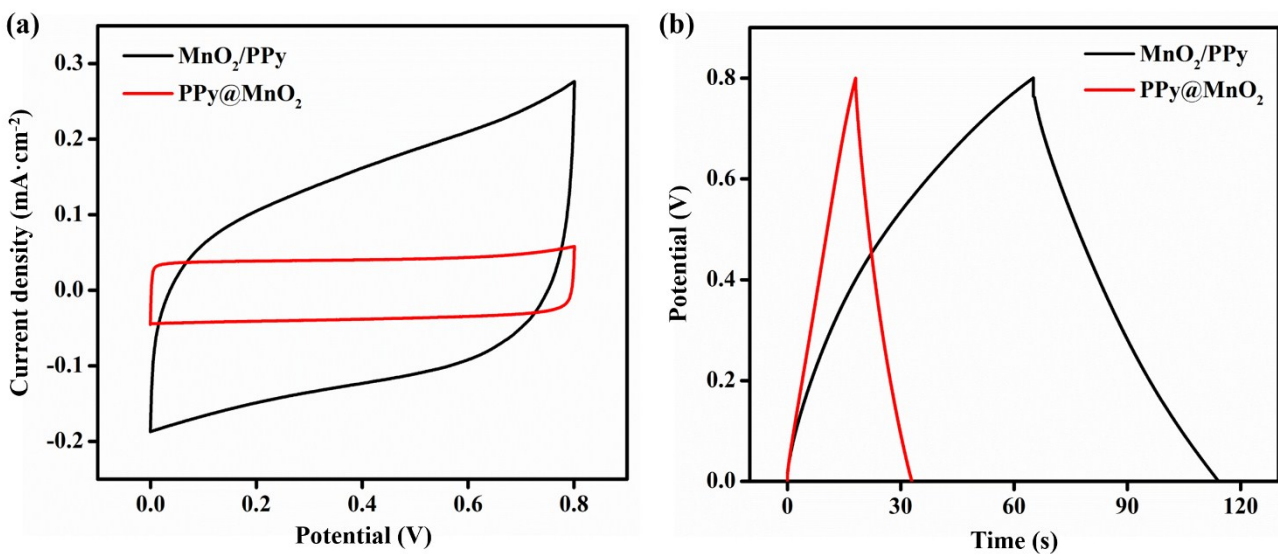

**Fig. S5.** Comparison of (a) CV and (b) GCD curves of  $\text{MnO}_2/\text{PPy}\text{-MSC}$  and  $\text{PPy}@MnO_2\text{-MSC}$ .

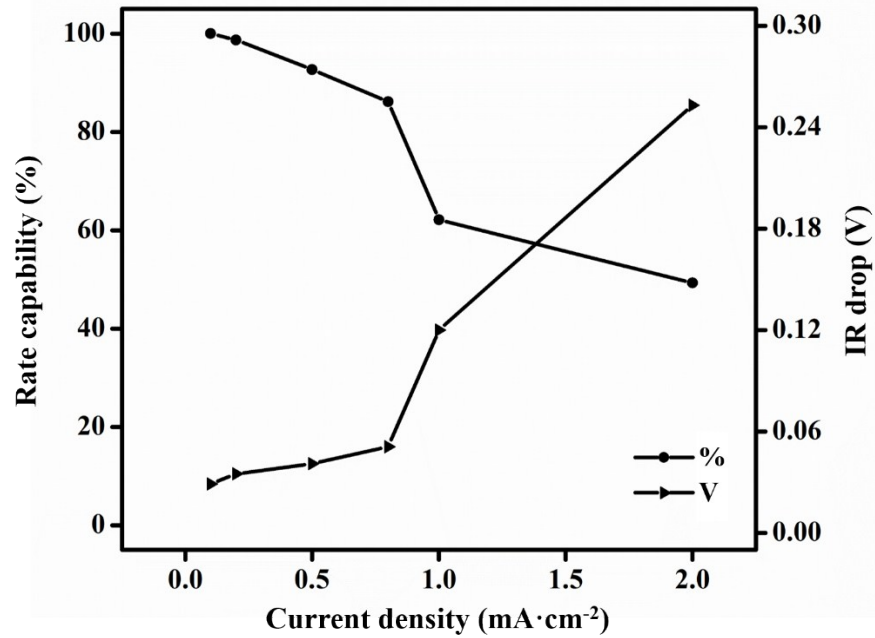

**Fig. S6.** Rate capability and corresponding voltage drop of MnO<sub>2</sub>/PPy-MSC at different current densities.

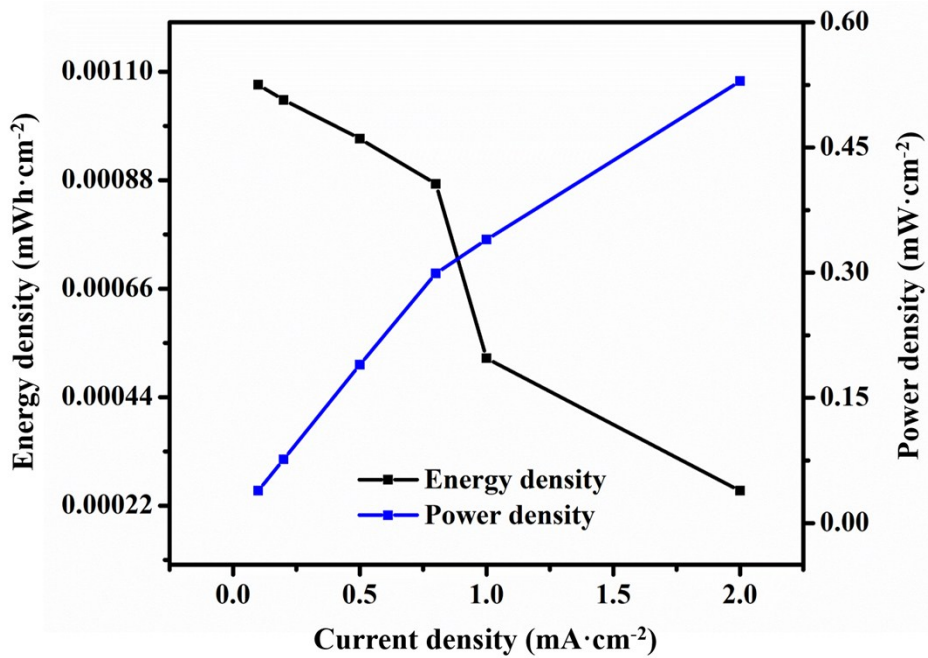

**Fig. S7.** Energy and power densities of MnO<sub>2</sub>/PPy-MSC at different current densities.
